# Supplementary material
Source: ML conference proceedings conference paper supplement (https://openreview.net/forum?id=PeLLMw3wLX)

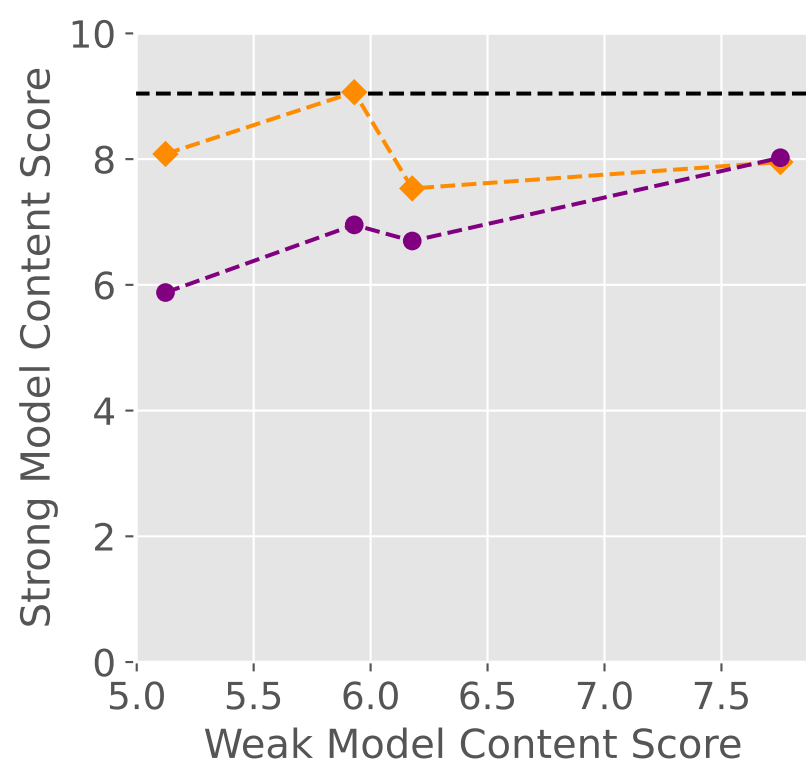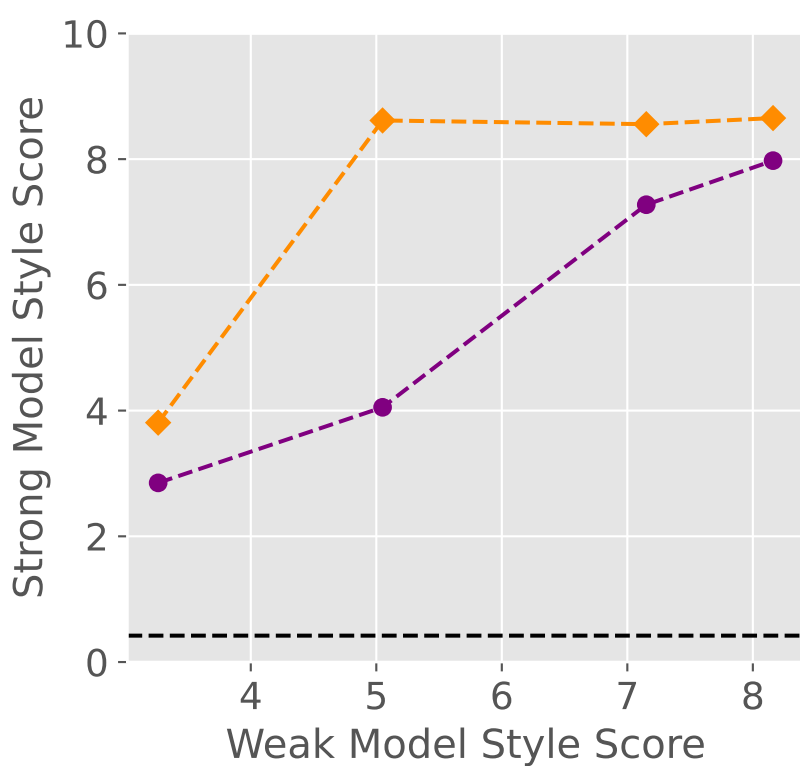

---- GPT-3.5-Turbo

---◇--- GPT-3.5-Turbo  
+ IaR (ours)

---●--- GPT-3.5-Turbo  
+ Naive FT

Supplement: supplementary_material [file attachment]

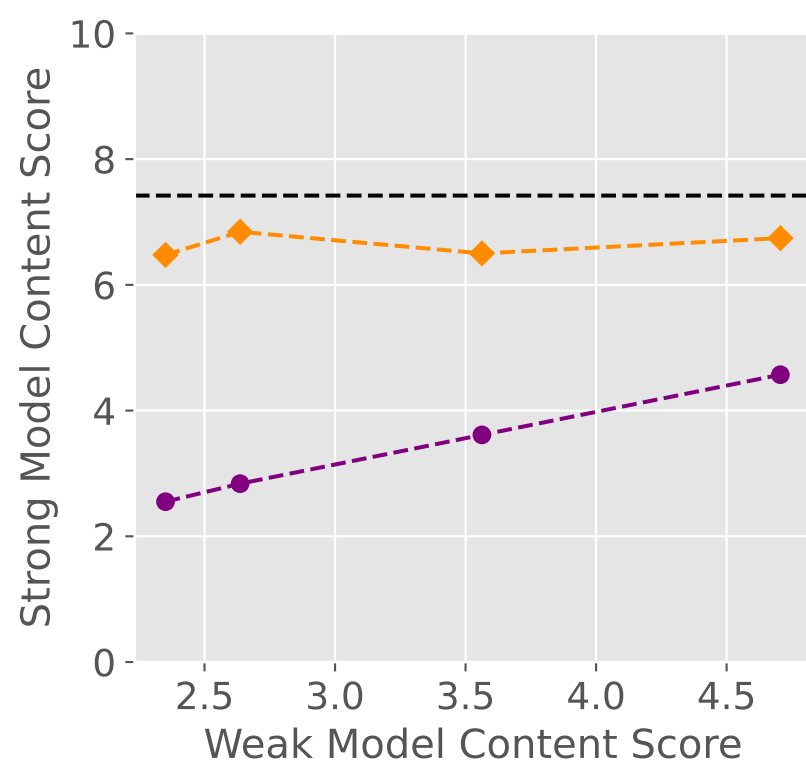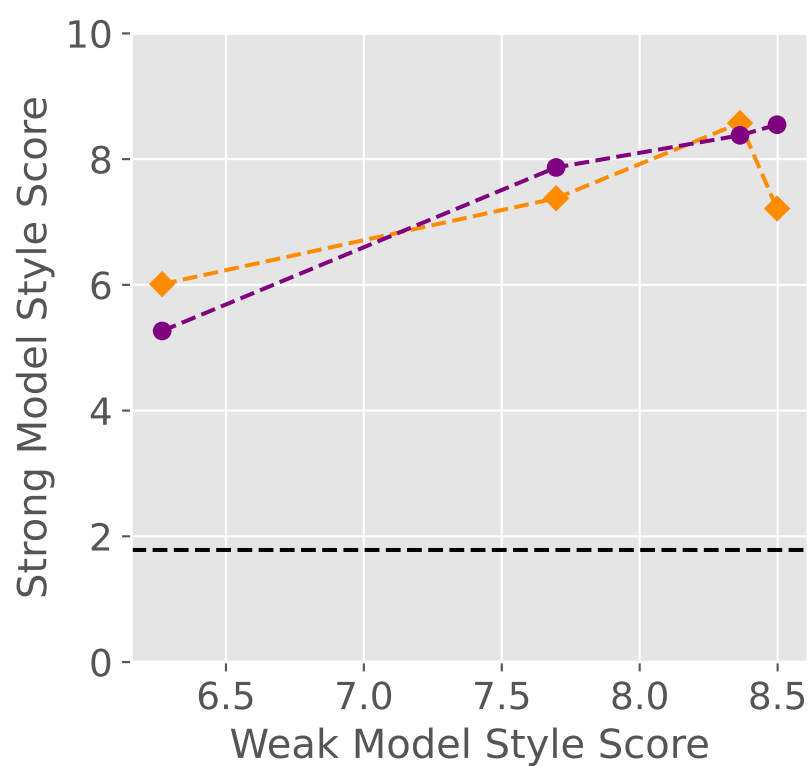

---- GPT-3.5-Turbo

--◇-- GPT-3.5-Turbo  
+ ICL (ours)

--●-- GPT-3.5-Turbo  
+ Naive FT

Supplement: supplementary_material [file attachment]

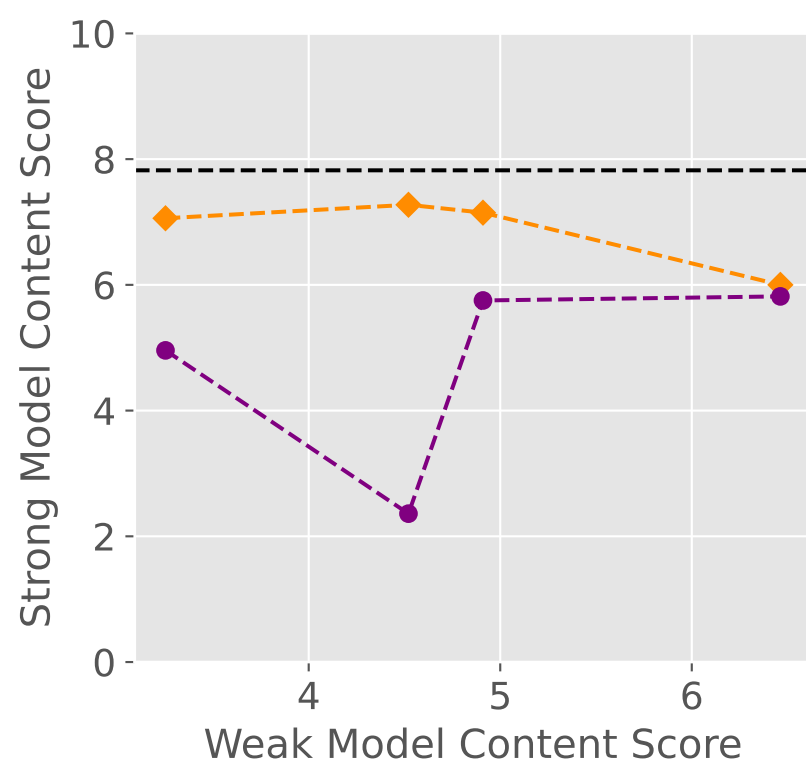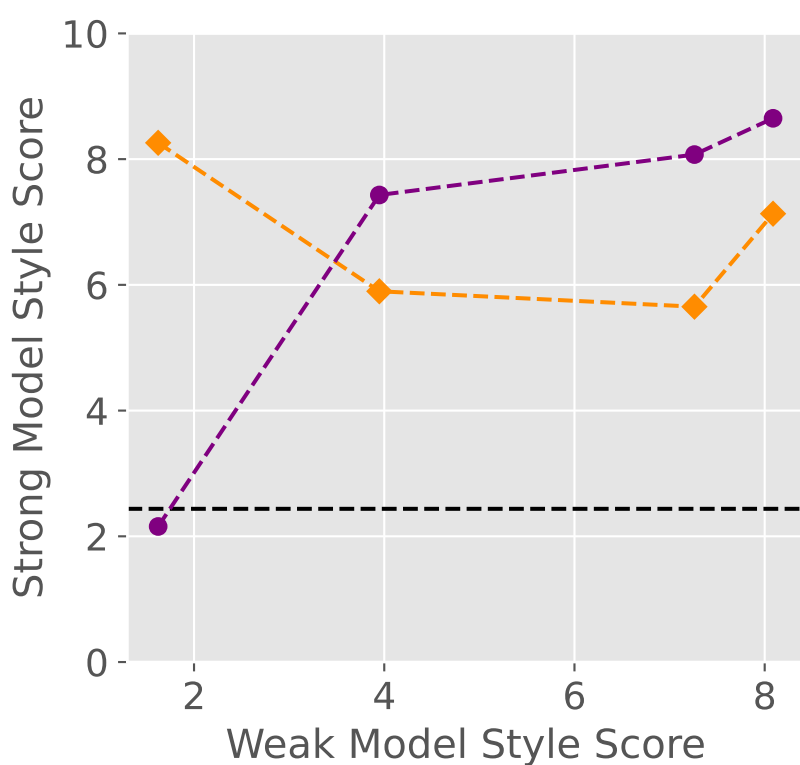

----- GPT-3.5-Turbo

-----◇----- GPT-3.5-Turbo  
+ IaR (ours)

-----●----- GPT-3.5-Turbo  
+ Naive FT

Supplement: supplementary_material [file attachment]

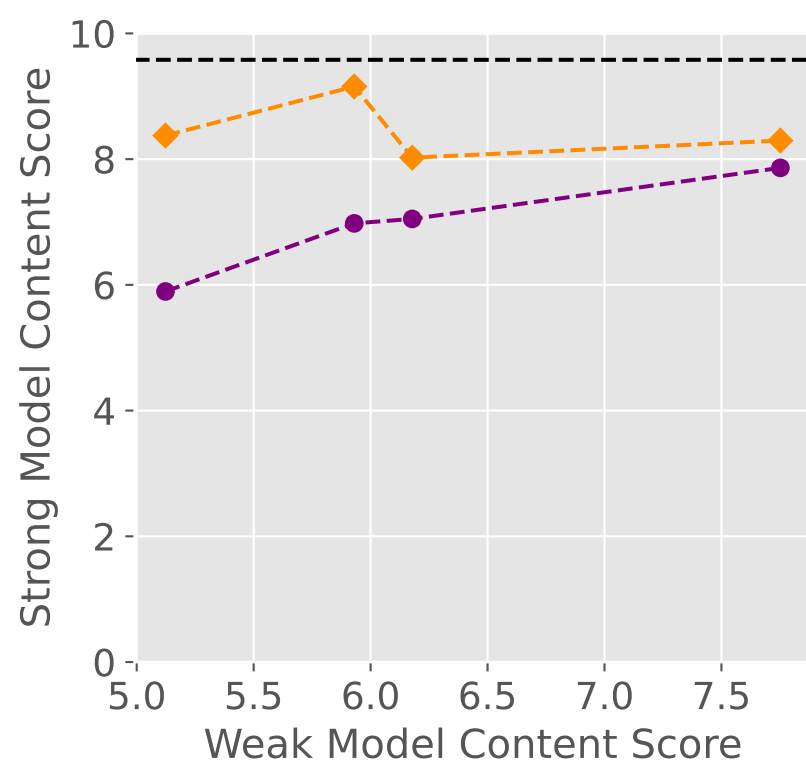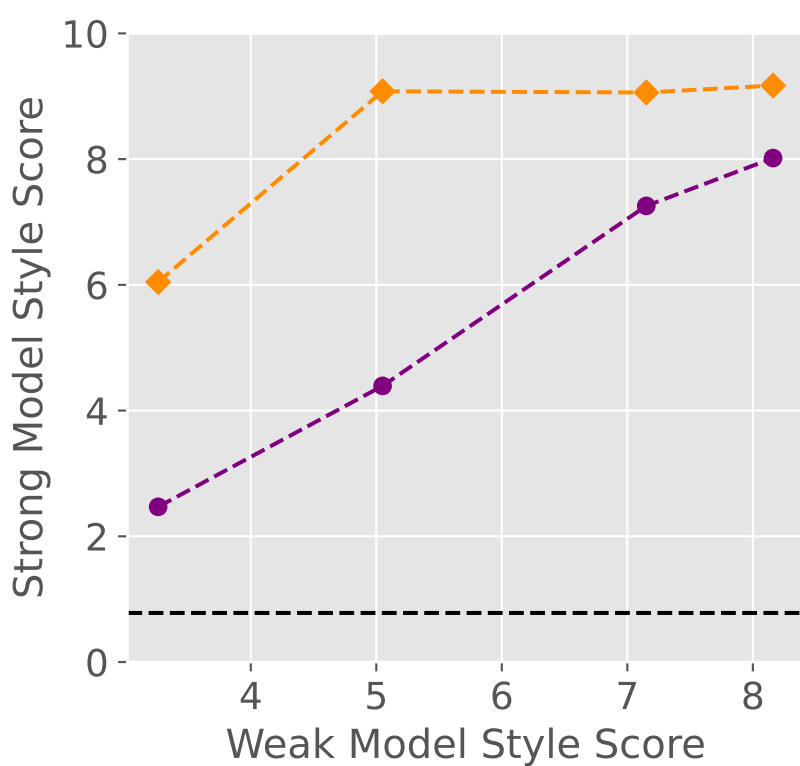

---- GPT-4o-mini

--◇-- GPT-4o-mini  
+ IaR (ours)

--●-- GPT-4o-mini  
+ Naive FT

Supplement: supplementary_material [file attachment]

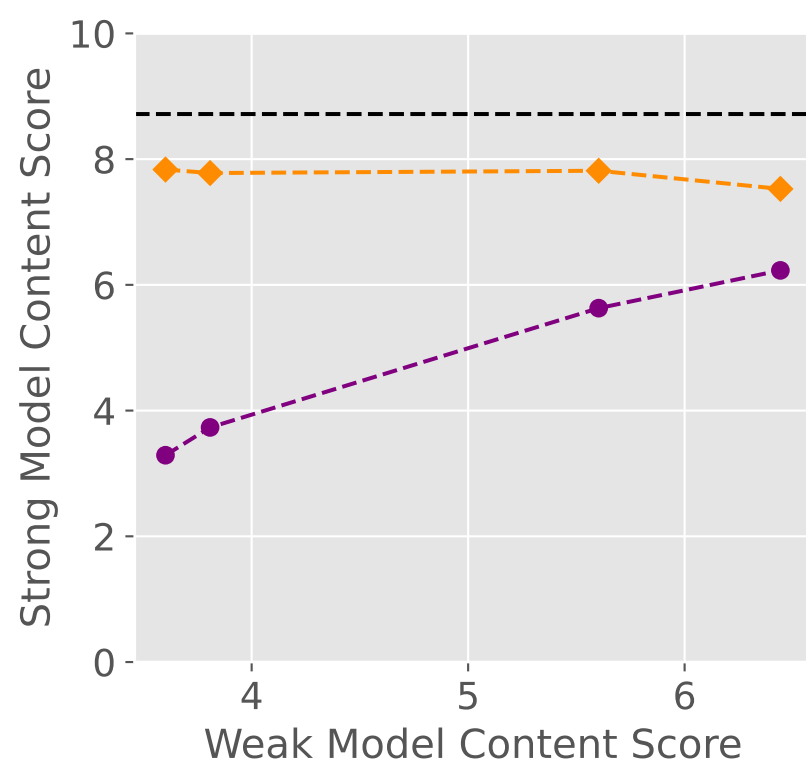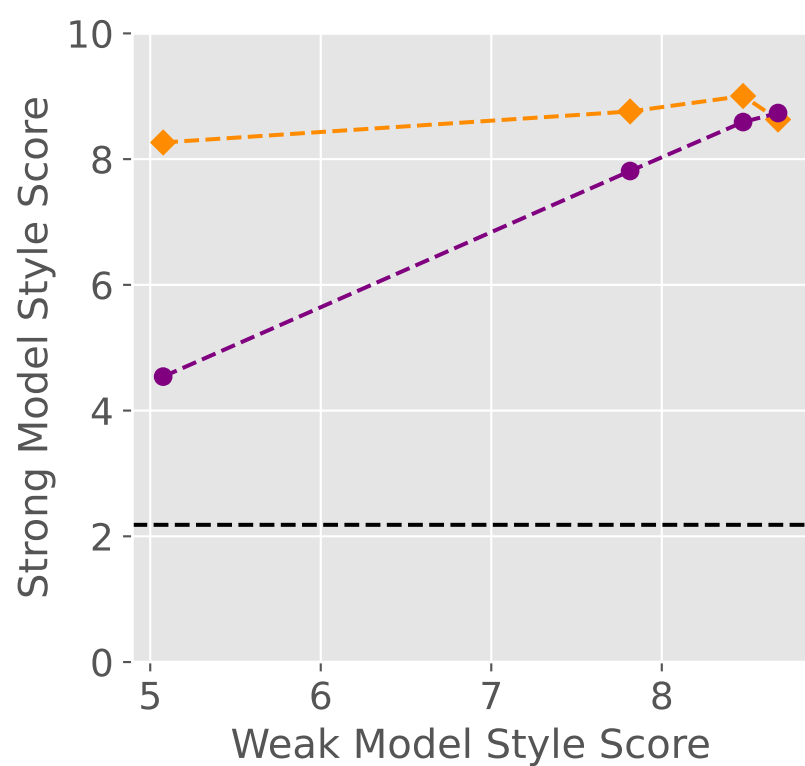

----- GPT-4o-mini

-◇- GPT-4o-mini  
+ IaR (ours)

-●- GPT-4o-mini  
+ Naive FT

Supplement: supplementary_material [file attachment]

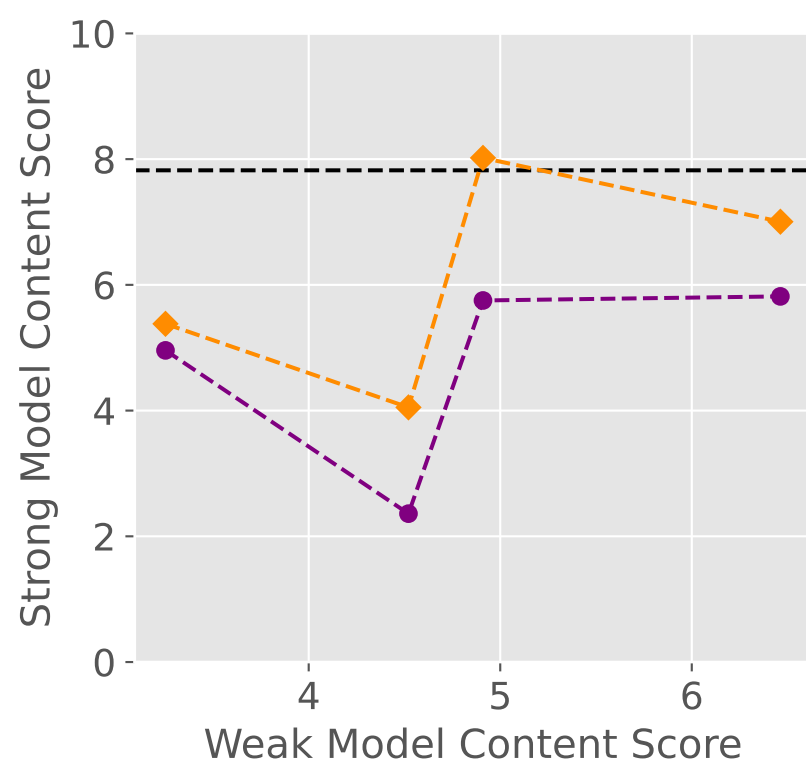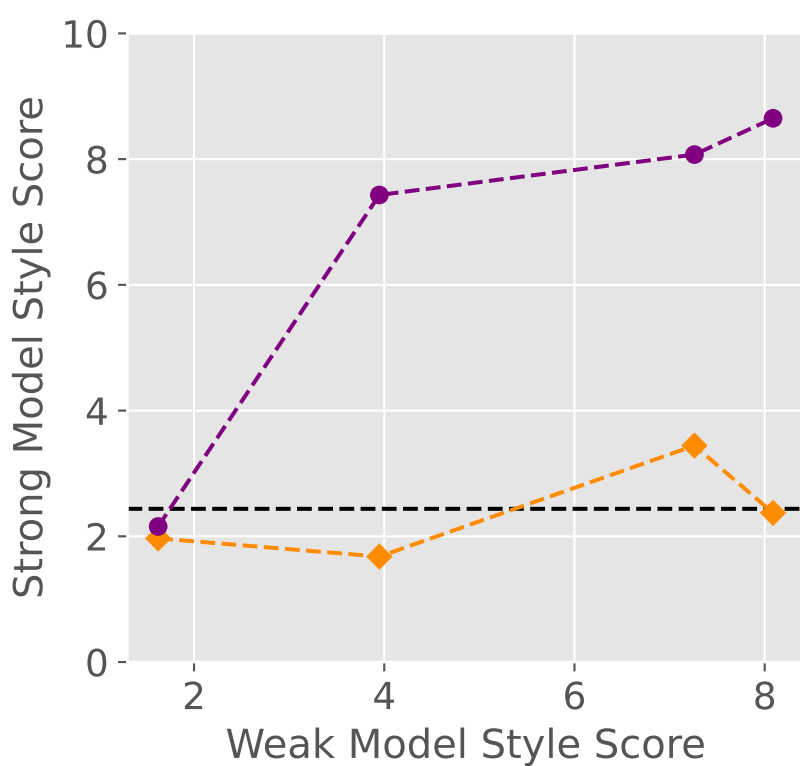

---- GPT-3.5-Turbo

--◇-- GPT-3.5-Turbo  
+ ICL (ours)

--●-- GPT-3.5-Turbo  
+ Naive FT

Supplement: supplementary_material [file attachment]

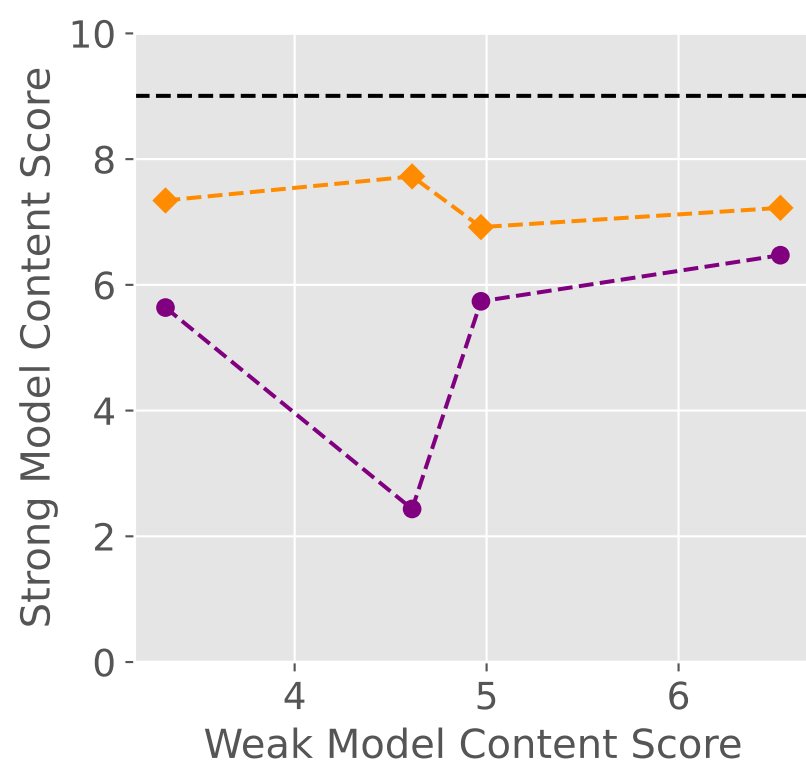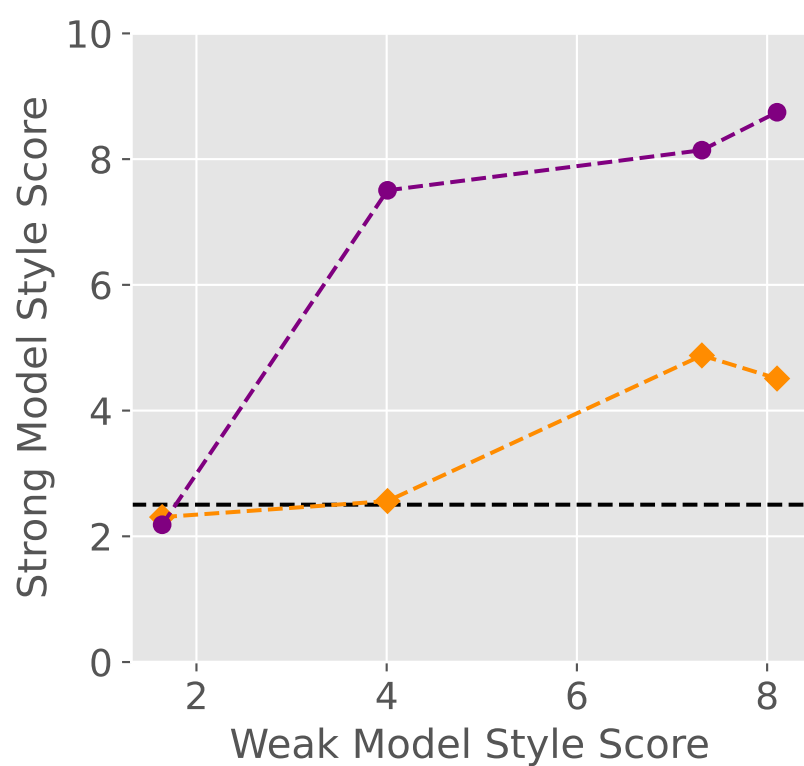

----- GPT-4o-mini

-----◆----- GPT-4o-mini  
+ IaR (ours)

-----●----- GPT-4o-mini  
+ Naive FT

Supplement: supplementary_material [file attachment]

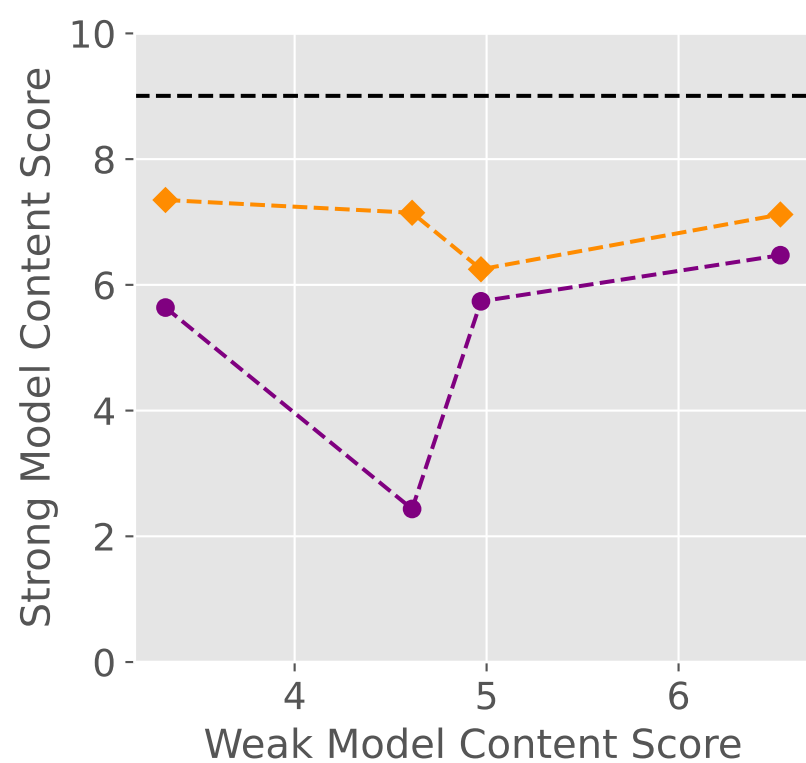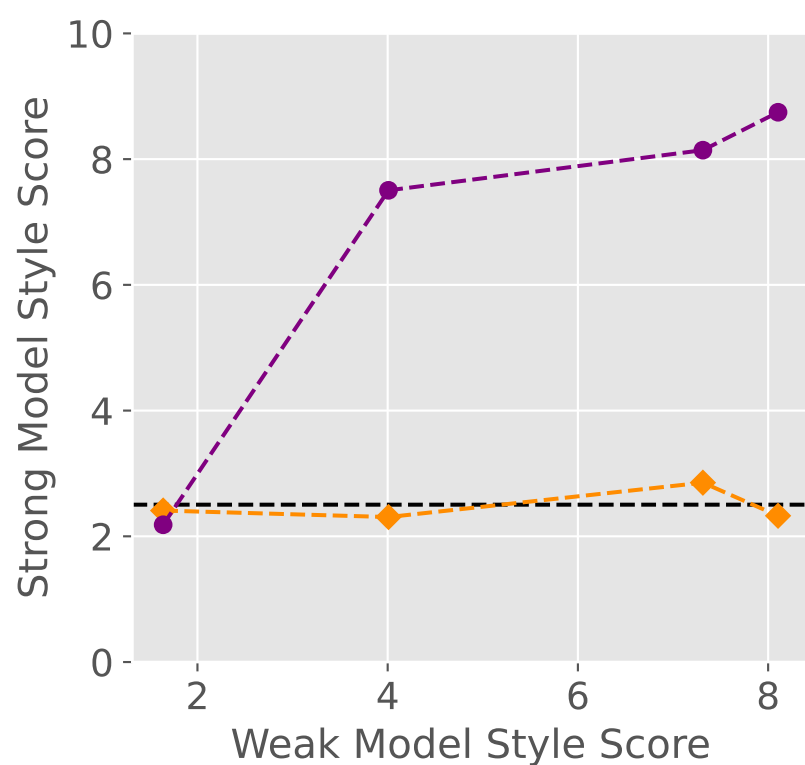

----- GPT-4o-mini

-----◆----- GPT-4o-mini  
+ ICL (ours)

-----●----- GPT-4o-mini  
+ Naive FT

Supplement: supplementary_material [file attachment]

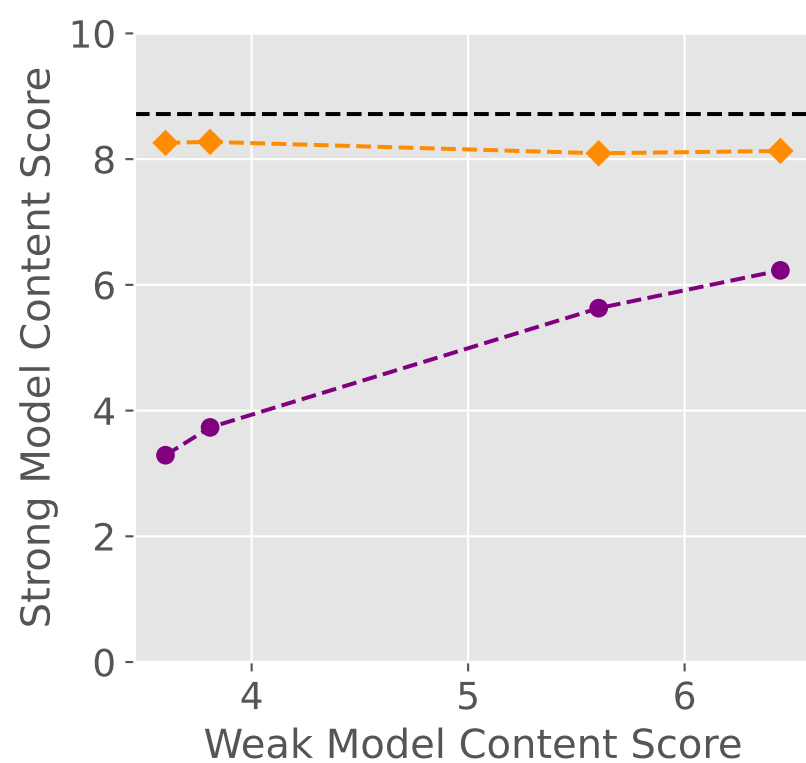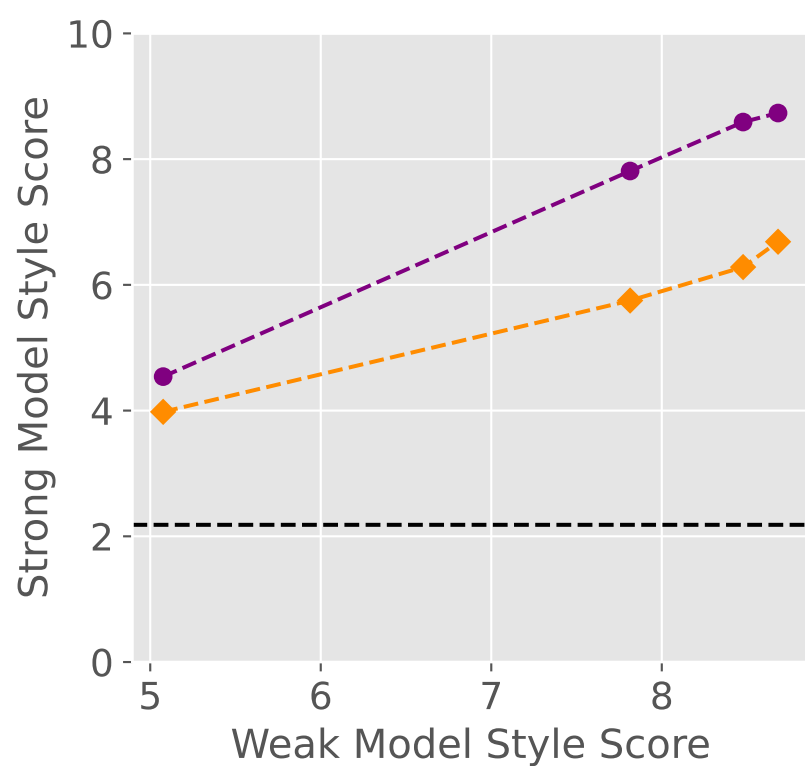

----- GPT-4o-mini

-◇- GPT-4o-mini  
+ ICL (ours)

-●- GPT-4o-mini  
+ Naive FT

Supplement: supplementary_material [file attachment]

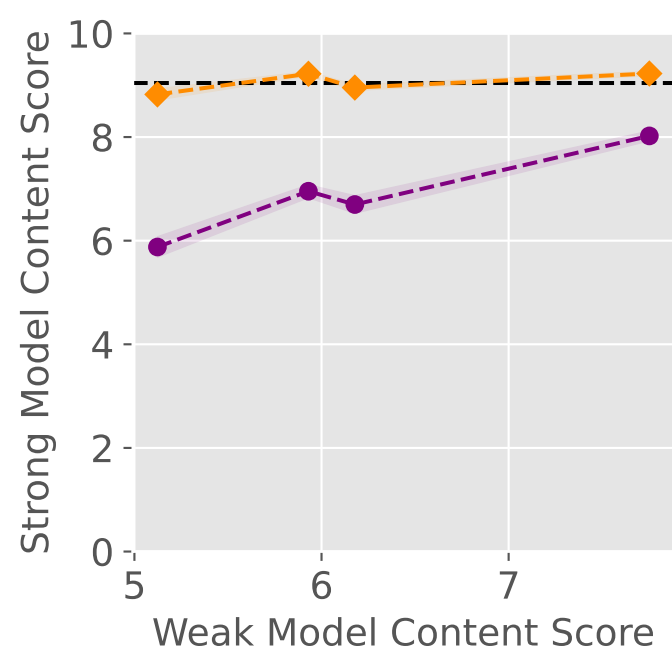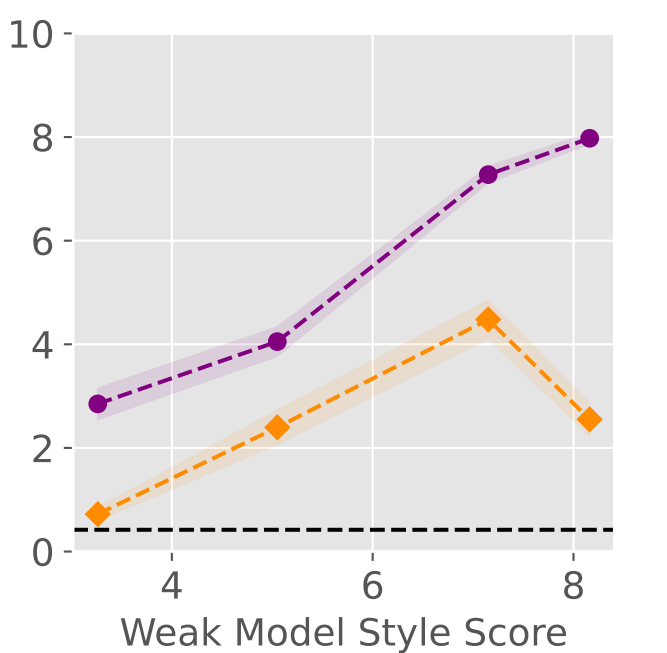

--- GPT-3.5-Turbo      -◇- GPT-3.5-Turbo + ICL      -●- GPT-3.5-Turbo + Naive FT

Supplement: supplementary_material [file attachment]

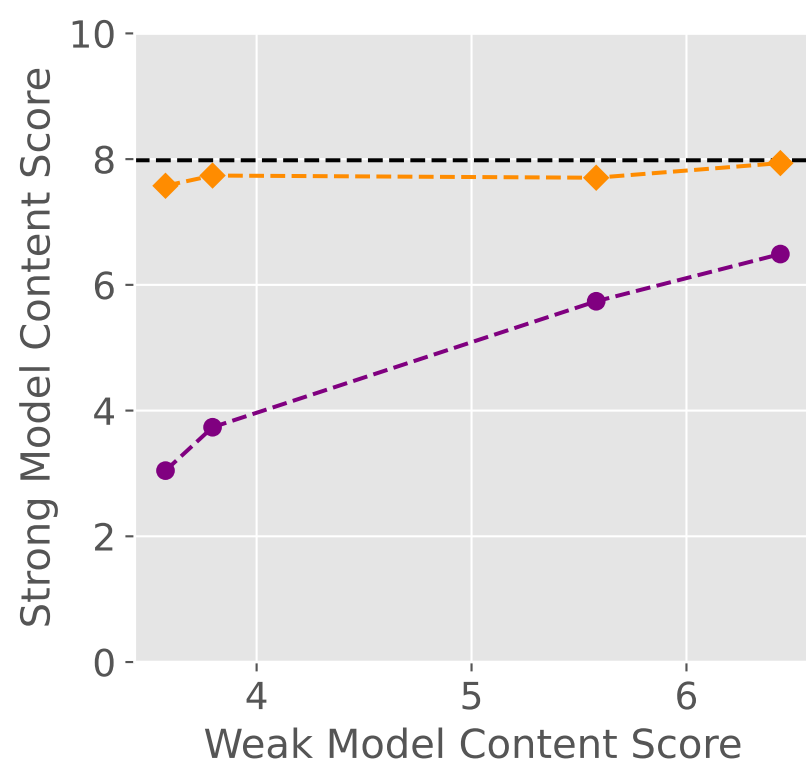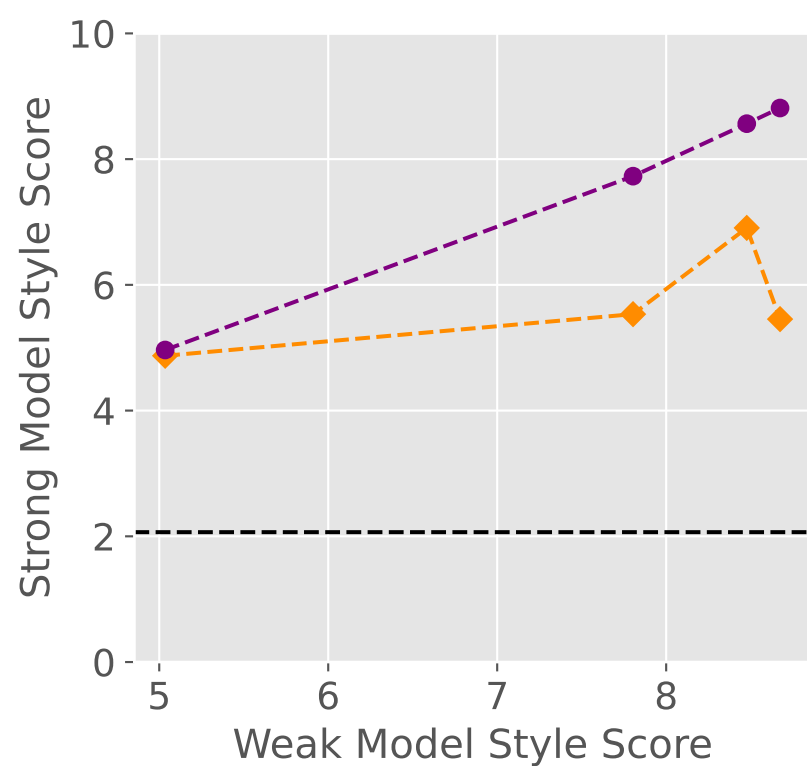

----- GPT-3.5-Turbo

-◇- GPT-3.5-Turbo  
+ ICL (ours)

-●- GPT-3.5-Turbo  
+ Naive FT

Supplement: supplementary_material [file attachment]

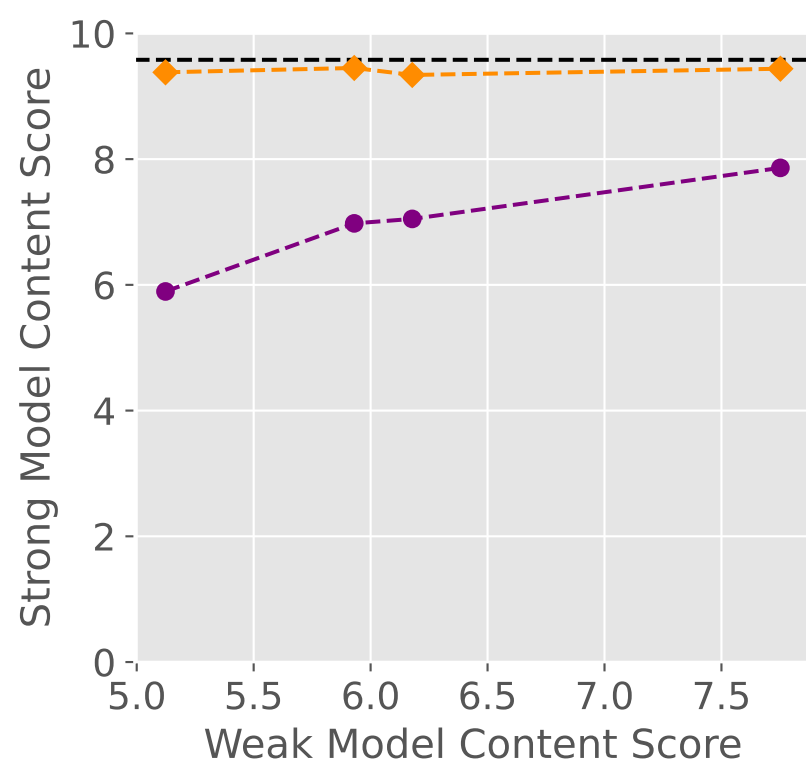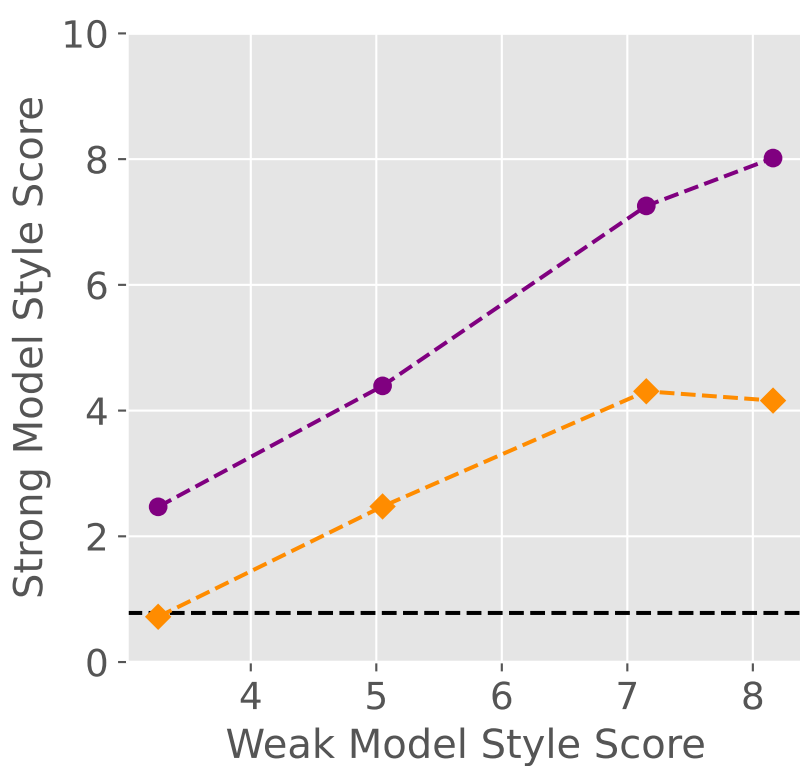

----- GPT-4o-mini

-◇- GPT-4o-mini  
+ ICL (ours)

-●- GPT-4o-mini  
+ Naive FT

Supplement: supplementary_material [file attachment]

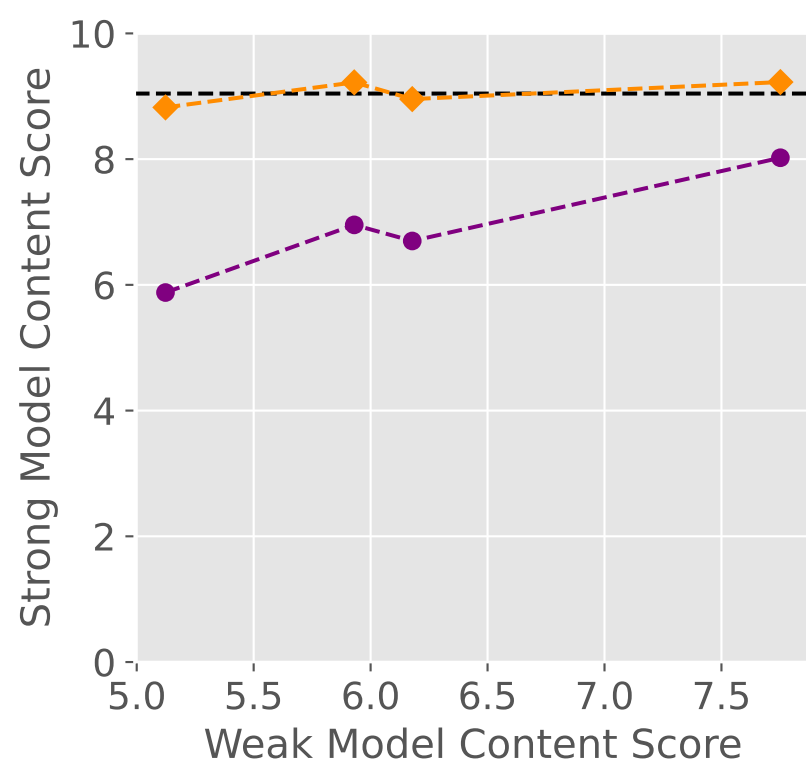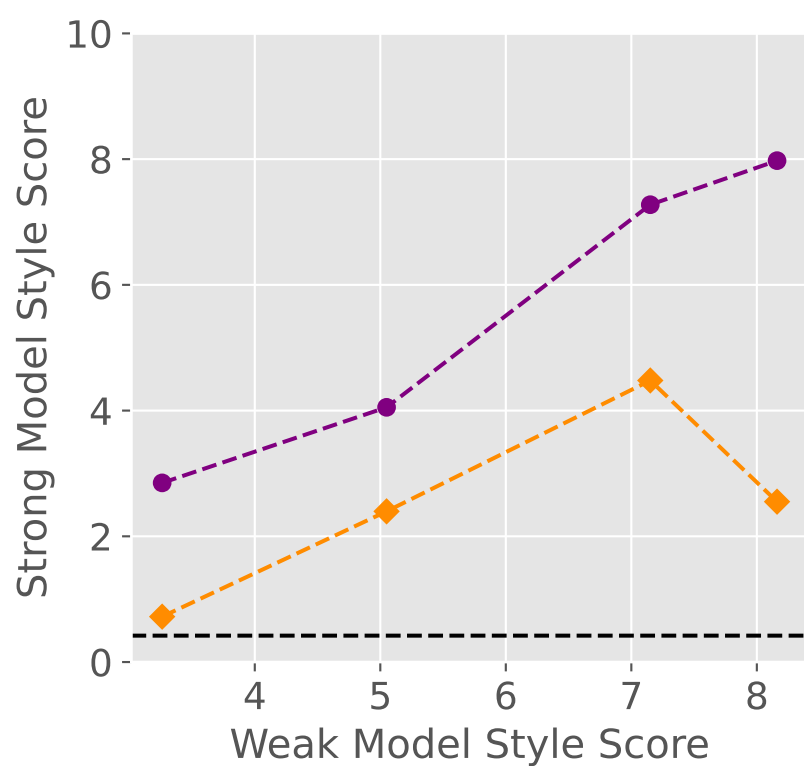

---- GPT-3.5-Turbo

--◇-- GPT-3.5-Turbo  
+ ICL (ours)

--●-- GPT-3.5-Turbo  
+ Naive FT

Supplement: supplementary_material [file attachment]

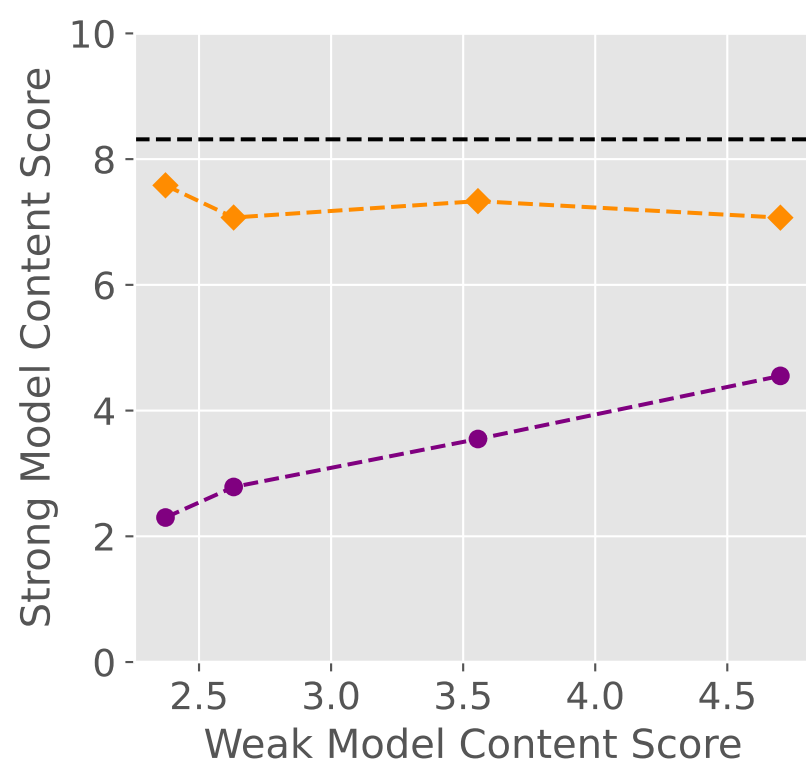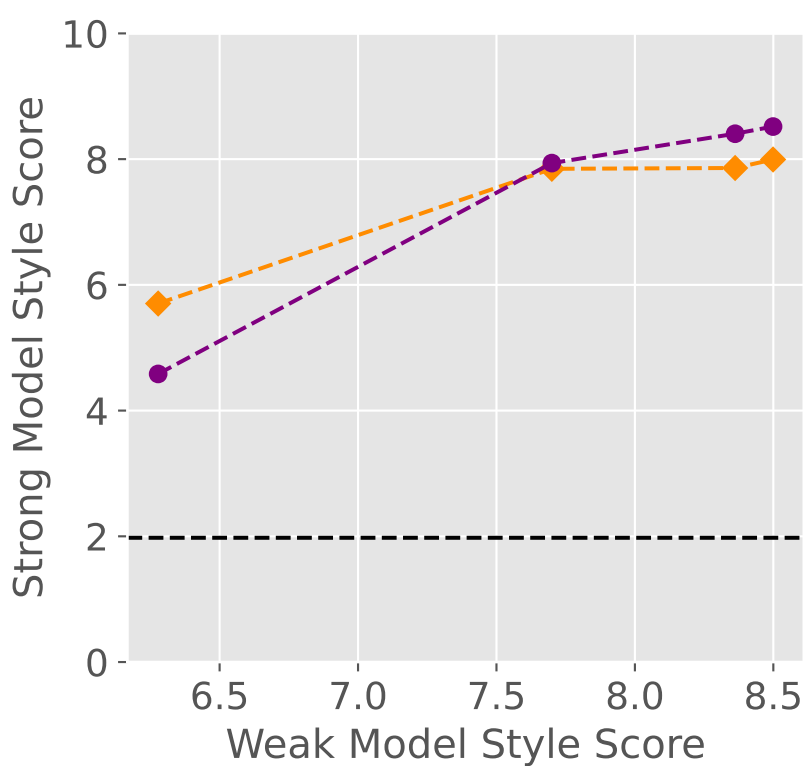

----- GPT-4o-mini

-----◇----- GPT-4o-mini  
+ ICL (ours)

-----●----- GPT-4o-mini  
+ Naive FT

Supplement: supplementary_material [file attachment]

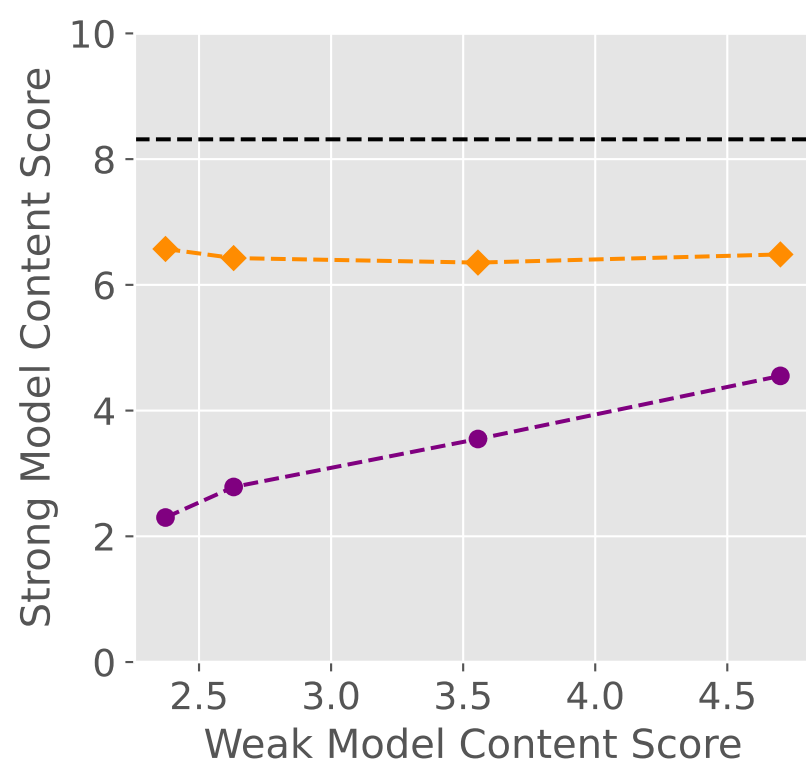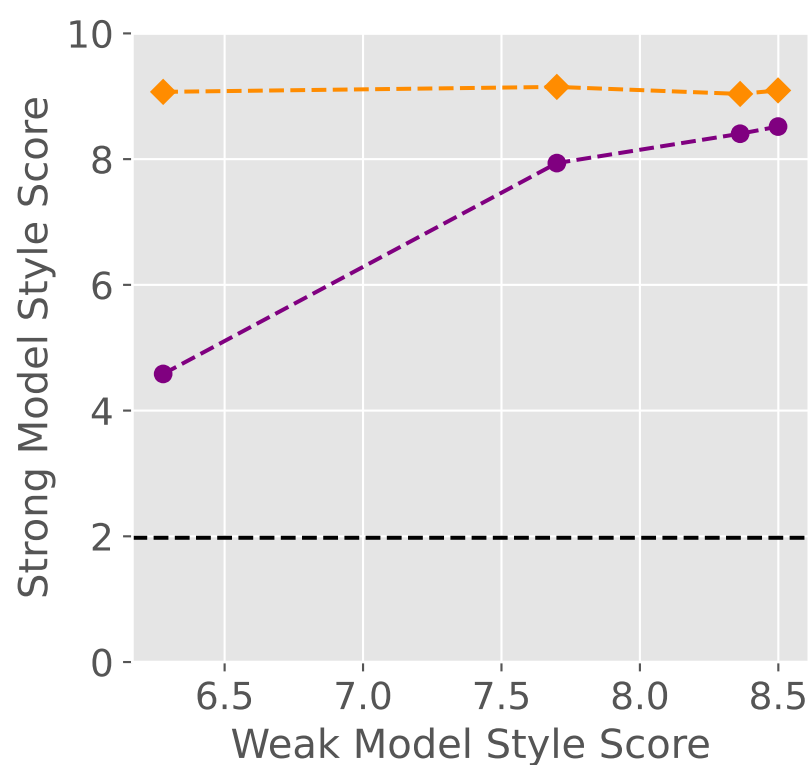

----- GPT-4o-mini

-----◆----- GPT-4o-mini  
+ IaR (ours)

-----●----- GPT-4o-mini  
+ Naive FT

Supplement: supplementary_material [file attachment]

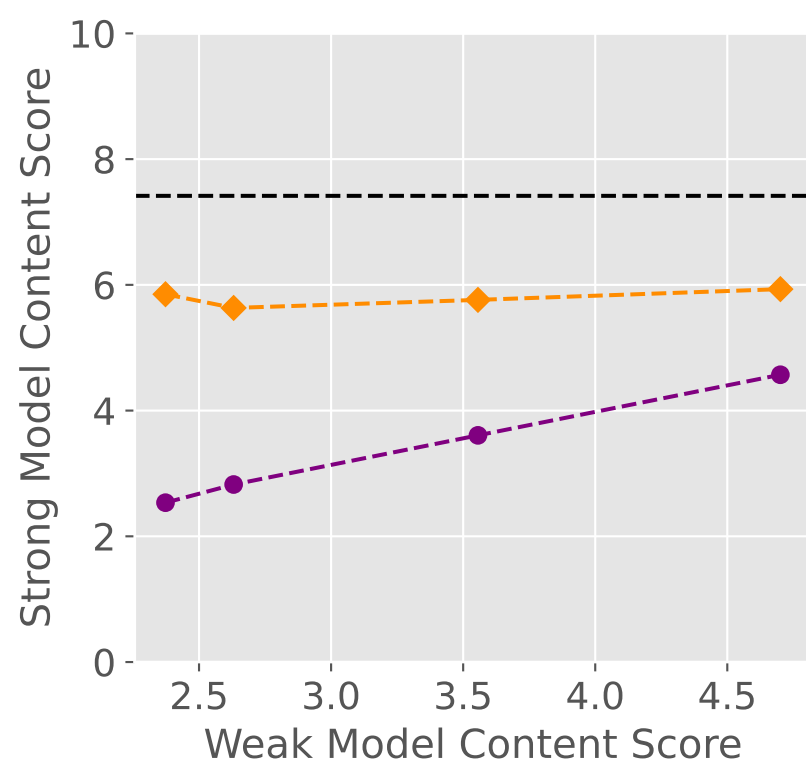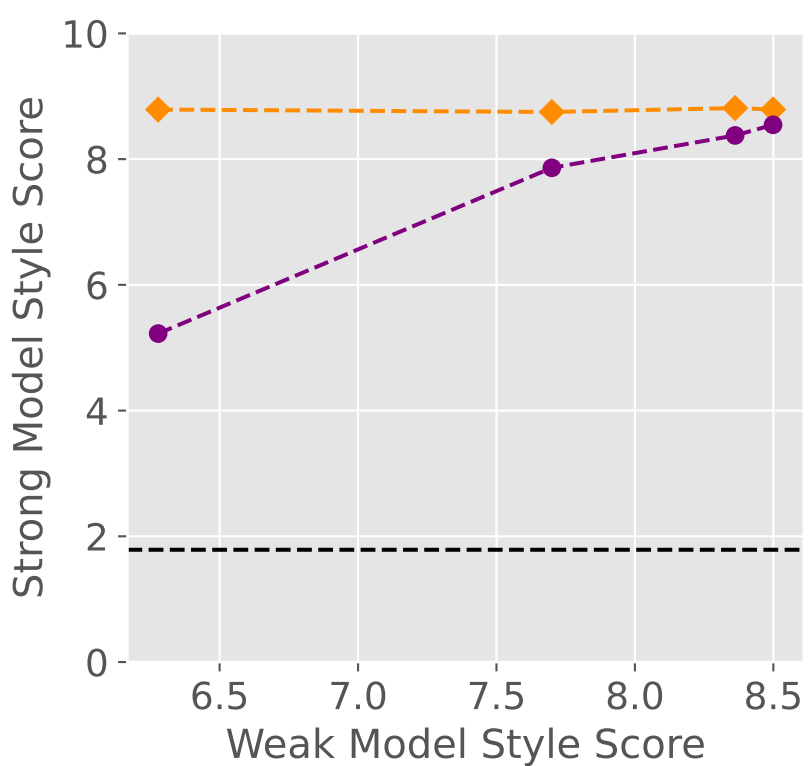

---- GPT-3.5-Turbo

-◇- GPT-3.5-Turbo  
+ IaR (ours)

-●- GPT-3.5-Turbo  
+ Naive FT

Supplement: supplementary_material [file attachment]

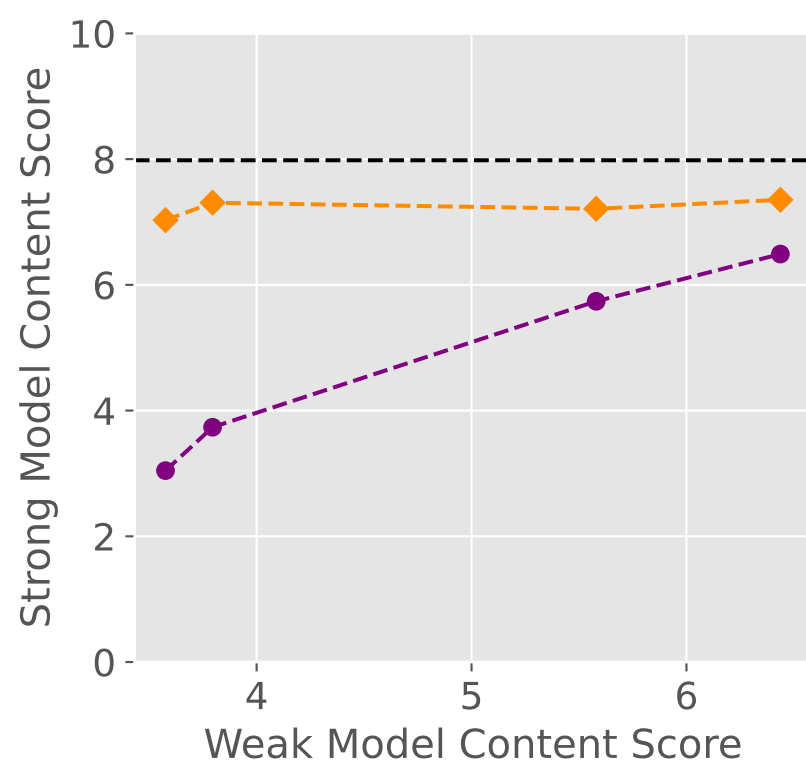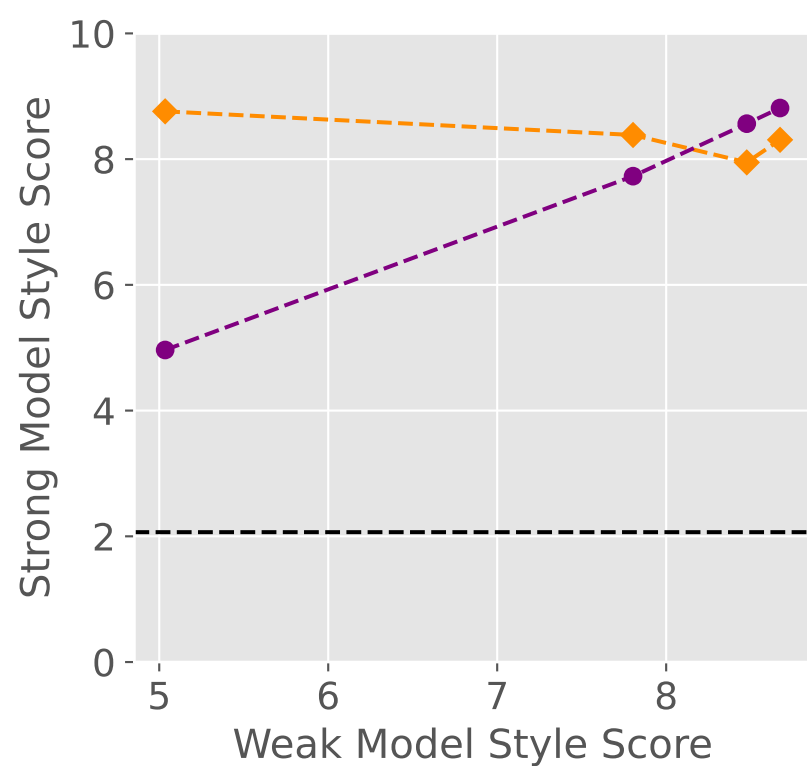

---- GPT-3.5-Turbo

--◇-- GPT-3.5-Turbo  
+ IaR (ours)

--●-- GPT-3.5-Turbo  
+ Naive FT

Supplement: supplementary_material [file attachment]
